# Supplementary material for: Centrality Measures in Residue Interaction Networks to Highlight Amino Acids in Protein–Protein Binding
Source: Front Bioinform. 2021 Jun 18;1:684970. doi: 10.3389/fbinf.2021.684970 (PMC9581030; doi:10.3389/fbinf.2021.684970)
Supplement: Supplementary file 2 [file Table1.XLSX]

## Sheet: all
noWater								water3.5								weight_1								water3.5 + weight_1								weight_2								water3.5 + weight_2								weight_3
|∆∆Gbinding| ≥ 2 kcal/mol								|∆∆Gbinding| ≥ 2 kcal/mol								|∆∆Gbinding| ≥ 2 kcal/mol								|∆∆Gbinding| ≥ 2 kcal/mol								|∆∆Gbinding| ≥ 2 kcal/mol								|∆∆Gbinding| ≥ 2 kcal/mol								|∆∆Gbinding| ≥ 2 kcal/mol
	bca	cca	rca	eca	dca	pra			bca	cca	rca	eca	dca	pra			bca	cca	rca	eca	dca	pra			bca	cca	rca	eca	dca	pra			bca	cca	rca	eca	dca	pra			bca	cca	rca	eca	dca	pra			bca
TP	194	74	156	156	61	39		TP	251	103	181	235	77	46		TP	158	68	136	172	69	42		TP	190	83	157	265	83	52		TP	166	64	148	171	72	42		TP	199	84	167	274	84	49		TP	166
TN	2066	2274	2120	2153	2311	2330		TN	1993	2260	2072	2053	2294	2313		TN	2091	2268	2130	2118	2301	2325		TN	2039	2264	2073	1998	2287	2307		TN	2088	2272	2121	2120	2303	2328		TN	2035	2276	2070	1999	2290	2306		TN	2088
FP	296	88	242	209	51	32		FP	369	102	290	309	68	49		FP	271	94	232	244	61	37		FP	323	98	289	364	75	55		FP	274	90	241	242	59	34		FP	327	86	292	363	72	56		FP	274
FN	483	603	521	521	616	638		FN	426	574	496	442	600	631		FN	519	609	541	505	608	635		FN	487	594	520	412	594	625		FN	511	613	529	506	605	635		FN	478	593	510	403	593	628		FN	511
PPV	0.3959	0.4568	0.392	0.4274	0.5446	0.5493		PPV	0.4048	0.5024	0.3843	0.432	0.531	0.4842		PPV	0.3683	0.4198	0.3696	0.4135	0.5308	0.5316		PPV	0.3704	0.4586	0.352	0.4213	0.5253	0.486		PPV	0.3773	0.4156	0.3805	0.414	0.5496	0.5526		PPV	0.3783	0.4941	0.3638	0.4301	0.5385	0.4667		PPV	0.3773
NPV	0.8105	0.7904	0.8027	0.8052	0.7895	0.785		NPV	0.8239	0.7975	0.8069	0.8228	0.7927	0.7857		NPV	0.8011	0.7883	0.7975	0.8075	0.791	0.7855		NPV	0.8072	0.7922	0.7995	0.829	0.7938	0.7868		NPV	0.8034	0.7875	0.8004	0.8073	0.792	0.7857		NPV	0.8098	0.7933	0.8023	0.8322	0.7943	0.786		NPV	0.8034
Sensitivity	0.2866	0.1093	0.2304	0.2304	0.0901	0.0576		Sensitivity	0.3708	0.1521	0.2674	0.3471	0.1137	0.0679		Sensitivity	0.2334	0.1004	0.2009	0.2541	0.1019	0.062		Sensitivity	0.2806	0.1226	0.2319	0.3914	0.1226	0.0768		Sensitivity	0.2452	0.0945	0.2186	0.2526	0.1064	0.062		Sensitivity	0.2939	0.1241	0.2467	0.4047	0.1241	0.0724		Sensitivity	0.2452
Specificity	0.8747	0.9627	0.8975	0.9115	0.9784	0.9865		Specificity	0.8438	0.9568	0.8772	0.8692	0.9712	0.9793		Specificity	0.8853	0.9602	0.9018	0.8967	0.9742	0.9843		Specificity	0.8633	0.9585	0.8776	0.8459	0.9682	0.9767		Specificity	0.884	0.9619	0.898	0.8975	0.975	0.9856		Specificity	0.8616	0.9636	0.8764	0.8463	0.9695	0.9763		Specificity	0.884
Accuracy	0.7437	0.7726	0.7489	0.7598	0.7805	0.7795		Accuracy	0.7384	0.7776	0.7414	0.7529	0.7802	0.7762		Accuracy	0.74	0.7687	0.7456	0.7535	0.7799	0.7789		Accuracy	0.7335	0.7723	0.7338	0.7447	0.7799	0.7762		Accuracy	0.7417	0.7687	0.7466	0.7539	0.7815	0.7799		Accuracy	0.7351	0.7766	0.7361	0.7479	0.7812	0.7749		Accuracy	0.7417
|∆∆Gbinding| ≥ 1.184 kcal/mol								|∆∆Gbinding| ≥ 1.184 kcal/mol								|∆∆Gbinding| ≥ 1.184 kcal/mol								|∆∆Gbinding| ≥ 1.184 kcal/mol								|∆∆Gbinding| ≥ 1.184 kcal/mol								|∆∆Gbinding| ≥ 1.184 kcal/mol								|∆∆Gbinding| ≥ 1.184 kcal/mol
	bca	cca	rca	eca	dca	pra			bca	cca	rca	eca	dca	pra			bca	cca	rca	eca	dca	pra			bca	cca	rca	eca	dca	pra			bca	cca	rca	eca	dca	pra			bca	cca	rca	eca	dca	pra			bca
TP	291	118	234	229	83	51		TP	373	149	275	345	108	63		TP	250	116	220	260	94	57		TP	298	127	256	392	113	70		TP	258	110	230	257	96	56		TP	309	125	263	401	116	69		TP	258
TN	1719	1874	1754	1782	1889	1898		TN	1671	1862	1722	1719	1881	1886		TN	1739	1872	1770	1762	1882	1896		TN	1703	1864	1728	1681	1873	1881		TN	1736	1874	1759	1762	1883	1898		TN	1701	1873	1722	1682	1878	1882		TN	1736
FP	199	44	164	136	29	20		FP	247	56	196	199	37	32		FP	179	46	148	156	36	22		FP	215	54	190	237	45	37		FP	182	44	159	156	35	20		FP	217	45	196	236	40	36		FP	182
FN	830	1003	887	892	1038	1070		FN	748	972	846	776	1013	1058		FN	871	1005	901	861	1027	1064		FN	823	994	865	729	1008	1051		FN	863	1011	891	864	1025	1065		FN	812	996	858	720	1005	1052		FN	863
PPV	0.5939	0.7284	0.5879	0.6274	0.7411	0.7183		PPV	0.6016	0.7268	0.5839	0.6342	0.7448	0.6632		PPV	0.5828	0.716	0.5978	0.625	0.7231	0.7215		PPV	0.5809	0.7017	0.574	0.6232	0.7152	0.6542		PPV	0.5864	0.7143	0.5913	0.6223	0.7328	0.7368		PPV	0.5875	0.7353	0.573	0.6295	0.7436	0.6571		PPV	0.5864
NPV	0.6744	0.6514	0.6641	0.6664	0.6454	0.6395		NPV	0.6908	0.657	0.6706	0.689	0.65	0.6406		NPV	0.6663	0.6507	0.6627	0.6717	0.647	0.6405		NPV	0.6742	0.6522	0.6664	0.6975	0.6501	0.6415		NPV	0.6679	0.6496	0.6638	0.671	0.6475	0.6406		NPV	0.6769	0.6528	0.6674	0.7002	0.6514	0.6414		NPV	0.6679
Sensitivity	0.2596	0.1053	0.2087	0.2043	0.074	0.0455		Sensitivity	0.3327	0.1329	0.2453	0.3078	0.0963	0.0562		Sensitivity	0.223	0.1035	0.1963	0.2319	0.0839	0.0508		Sensitivity	0.2658	0.1133	0.2284	0.3497	0.1008	0.0624		Sensitivity	0.2302	0.0981	0.2052	0.2293	0.0856	0.05		Sensitivity	0.2756	0.1115	0.2346	0.3577	0.1035	0.0616		Sensitivity	0.2302
Specificity	0.8962	0.9771	0.9145	0.9291	0.9849	0.9896		Specificity	0.8712	0.9708	0.8978	0.8962	0.9807	0.9833		Specificity	0.9067	0.976	0.9228	0.9187	0.9812	0.9885		Specificity	0.8879	0.9718	0.9009	0.8764	0.9765	0.9807		Specificity	0.9051	0.9771	0.9171	0.9187	0.9818	0.9896		Specificity	0.8869	0.9765	0.8978	0.877	0.9791	0.9812		Specificity	0.9051
Accuracy	0.6614	0.6555	0.6542	0.6617	0.6489	0.6413		Accuracy	0.6726	0.6617	0.6571	0.6792	0.6545	0.6413		Accuracy	0.6545	0.6542	0.6548	0.6654	0.6502	0.6426		Accuracy	0.6584	0.6551	0.6528	0.6821	0.6535	0.642		Accuracy	0.6561	0.6528	0.6545	0.6644	0.6512	0.643		Accuracy	0.6614	0.6575	0.6532	0.6854	0.6561	0.642		Accuracy	0.6561
|∆∆Gbinding| ≥ 0.592 kcal/mol								|∆∆Gbinding| ≥ 0.592 kcal/mol								|∆∆Gbinding| ≥ 0.592 kcal/mol								|∆∆Gbinding| ≥ 0.592 kcal/mol								|∆∆Gbinding| ≥ 0.592 kcal/mol								|∆∆Gbinding| ≥ 0.592 kcal/mol								|∆∆Gbinding| ≥ 0.592 kcal/mol
	bca	cca	rca	eca	dca	pra			bca	cca	rca	eca	dca	pra			bca	cca	rca	eca	dca	pra			bca	cca	rca	eca	dca	pra			bca	cca	rca	eca	dca	pra			bca	cca	rca	eca	dca	pra			bca
TP	366	140	298	287	97	57		TP	466	173	352	428	129	79		TP	316	139	275	326	110	64		TP	381	151	336	494	136	87		TP	328	128	288	322	111	63		TP	393	145	338	505	137	85		TP	328
TN	1240	1342	1264	1286	1349	1350		TN	1210	1332	1245	1248	1348	1348		TN	1251	1341	1271	1274	1344	1349		TN	1232	1334	1254	1229	1342	1344		TN	1252	1338	1263	1273	1344	1351		TN	1231	1339	1243	1232	1345	1344		TN	1252
FP	124	22	100	78	15	14		FP	154	32	119	116	16	16		FP	113	23	93	90	20	15		FP	132	30	110	135	22	20		FP	112	26	101	91	20	13		FP	133	25	121	132	19	20		FP	112
FN	1309	1535	1377	1388	1578	1618		FN	1209	1502	1323	1247	1546	1596		FN	1359	1536	1400	1349	1565	1611		FN	1294	1524	1339	1181	1539	1588		FN	1347	1547	1387	1353	1564	1612		FN	1282	1530	1337	1170	1538	1590		FN	1347
PPV	0.7469	0.8642	0.7487	0.7863	0.8661	0.8028		PPV	0.7516	0.8439	0.7473	0.7868	0.8897	0.8316		PPV	0.7366	0.858	0.7473	0.7837	0.8462	0.8101		PPV	0.7427	0.8343	0.7534	0.7854	0.8608	0.8131		PPV	0.7455	0.8312	0.7404	0.7797	0.8473	0.8289		PPV	0.7471	0.8529	0.7364	0.7928	0.8782	0.8095		PPV	0.7455
NPV	0.4865	0.4665	0.4786	0.4809	0.4609	0.4549		NPV	0.5002	0.47	0.4848	0.5002	0.4658	0.4579		NPV	0.4793	0.4661	0.4759	0.4857	0.462	0.4557		NPV	0.4877	0.4668	0.4836	0.51	0.4658	0.4584		NPV	0.4817	0.4638	0.4766	0.4848	0.4622	0.456		NPV	0.4899	0.4667	0.4818	0.5129	0.4665	0.4581		NPV	0.4817
Sensitivity	0.2185	0.0836	0.1779	0.1713	0.0579	0.034		Sensitivity	0.2782	0.1033	0.2101	0.2555	0.077	0.0472		Sensitivity	0.1887	0.083	0.1642	0.1946	0.0657	0.0382		Sensitivity	0.2275	0.0901	0.2006	0.2949	0.0812	0.0519		Sensitivity	0.1958	0.0764	0.1719	0.1922	0.0663	0.0376		Sensitivity	0.2346	0.0866	0.2018	0.3015	0.0818	0.0507		Sensitivity	0.1958
Specificity	0.9091	0.9839	0.9267	0.9428	0.989	0.9897		Specificity	0.8871	0.9765	0.9128	0.915	0.9883	0.9883		Specificity	0.9172	0.9831	0.9318	0.934	0.9853	0.989		Specificity	0.9032	0.978	0.9194	0.901	0.9839	0.9853		Specificity	0.9179	0.9809	0.926	0.9333	0.9853	0.9905		Specificity	0.9025	0.9817	0.9113	0.9032	0.9861	0.9853		Specificity	0.9179
Accuracy	0.5285	0.4877	0.514	0.5176	0.4758	0.463		Accuracy	0.5515	0.4952	0.5255	0.5515	0.486	0.4696		Accuracy	0.5156	0.487	0.5087	0.5265	0.4784	0.465		Accuracy	0.5308	0.4886	0.5232	0.567	0.4863	0.4709		Accuracy	0.5199	0.4824	0.5104	0.5248	0.4788	0.4653		Accuracy	0.5344	0.4883	0.5202	0.5716	0.4877	0.4702		Accuracy	0.5199
								|∆∆Gbinding| ≥ 2 kcal/mol								|∆∆Gbinding| ≥ 2 kcal/mol								|∆∆Gbinding| ≥ 2 kcal/mol								|∆∆Gbinding| ≥ 2 kcal/mol								|∆∆Gbinding| ≥ 2 kcal/mol								|∆∆Gbinding| ≥ 2 kcal/mol
									Δbca	Δcca	Δrca	Δeca	Δdca	Δpra			Δbca	Δcca	Δrca	Δeca	Δdca	Δpra			Δbca	Δcca	Δrca	Δeca	Δdca	Δpra			Δbca	Δcca	Δrca	Δeca	Δdca	Δpra			Δbca	Δcca	Δrca	Δeca	Δdca	Δpra			Δbca
				Difference weight to basic				TP	57	29	25	79	16	7		TP	-36	-6	-20	16	8	3		TP	-61	-20	-24	30	6	6		TP	-28	-10	-8	15	11	3		TP	-52	-19	-14	39	7	3		TP	-28
				(with or without water)				TN	-73	-14	-48	-100	-17	-17		TN	25	-6	10	-35	-10	-5		TN	46	4	1	-55	-7	-6		TN	22	-2	1	-33	-8	-2		TN	42	16	-2	-54	-4	-7		TN	22
				first is with vs wo water				FP	73	14	48	100	17	17		FP	-25	6	-10	35	10	5		FP	-46	-4	-1	55	7	6		FP	-22	2	-1	33	8	2		FP	-42	-16	2	54	4	7		FP	-22
								FN	-57	-29	-25	-79	-16	-7		FN	36	6	20	-16	-8	-3		FN	61	20	24	-30	-6	-6		FN	28	10	8	-15	-11	-3		FN	52	19	14	-39	-7	-3		FN	28
								PPV	0.0089	0.0456	-0.0077	0.0046	-0.0136	-0.0651		PPV	-0.0276	-0.037	-0.0224	-0.0139	-0.0138	-0.0177		PPV	-0.0344	-0.0438	-0.0323	-0.0107	-0.0057	0.0018		PPV	-0.0186	-0.0412	-0.0115	-0.0134	0.005	0.0033		PPV	-0.0265	-0.0083	-0.0205	-0.0019	0.0075	-0.0175		PPV	-0.0186
								NPV	0.0134	0.0071	0.0042	0.0176	0.0032	0.0007		NPV	-0.0094	-0.0021	-0.0052	0.0023	0.0015	0.0005		NPV	-0.0167	-0.0053	-0.0074	0.0062	0.0011	0.0011		NPV	-0.0071	-0.0029	-0.0023	0.0021	0.0025	0.0007		NPV	-0.0141	-0.0042	-0.0046	0.0094	0.0016	0.0003		NPV	-0.0071
								Sensitivity	0.0842	0.0428	0.037	0.1167	0.0236	0.0103		Sensitivity	-0.0532	-0.0089	-0.0295	0.0237	0.0118	0.0044		Sensitivity	-0.0902	-0.0295	-0.0355	0.0443	0.0089	0.0089		Sensitivity	-0.0414	-0.0148	-0.0118	0.0222	0.0163	0.0044		Sensitivity	-0.0769	-0.028	-0.0207	0.0576	0.0104	0.0045		Sensitivity	-0.0414
								Specificity	-0.0309	-0.0059	-0.0203	-0.0423	-0.0072	-0.0072		Specificity	0.0106	-0.0025	0.0043	-0.0148	-0.0042	-0.0022		Specificity	0.0195	0.0017	0.0004	-0.0233	-0.003	-0.0026		Specificity	0.0093	-0.0008	0.0005	-0.014	-0.0034	-0.0009		Specificity	0.0178	0.0068	-0.0008	-0.0229	-0.0017	-0.003		Specificity	0.0093
								Accuracy	-0.0053	0.005	-0.0075	-0.0069	-0.0003	-0.0033		Accuracy	-0.0037	-0.0039	-0.0033	-0.0063	-0.0006	-0.0006		Accuracy	-0.0049	-0.0053	-0.0076	-0.0082	-0.0003	0		Accuracy	-0.002	-0.0039	-0.0023	-0.0059	0.001	0.0004		Accuracy	-0.0033	-0.001	-0.0053	-0.005	0.001	-0.0013		Accuracy	-0.002
								|∆∆Gbinding| ≥ 1.184 kcal/mol								|∆∆Gbinding| ≥ 1.184 kcal/mol								|∆∆Gbinding| ≥ 1.184 kcal/mol								|∆∆Gbinding| ≥ 1.184 kcal/mol								|∆∆Gbinding| ≥ 1.184 kcal/mol								|∆∆Gbinding| ≥ 1.184 kcal/mol
								TP	82	31	41	116	25	12		TP	-41	-2	-14	31	11	6		TP	-75	-22	-19	47	5	7		TP	-33	-8	-4	28	13	5		TP	-64	-24	-12	56	8	6		TP	-33
								TN	-48	-12	-32	-63	-8	-12		TN	20	-2	16	-20	-7	-2		TN	32	2	6	-38	-8	-5		TN	17	0	5	-20	-6	0		TN	30	11	0	-37	-3	-4		TN	17
								FP	48	12	32	63	8	12		FP	-20	2	-16	20	7	2		FP	-32	-2	-6	38	8	5		FP	-17	0	-5	20	6	0		FP	-30	-11	0	37	3	4		FP	-17
								FN	-82	-31	-41	-116	-25	-12		FN	41	2	14	-31	-11	-6		FN	75	22	19	-47	-5	-7		FN	33	8	4	-28	-13	-5		FN	64	24	12	-56	-8	-6		FN	33
								PPV	0.0077	-0.0016	-0.004	0.0068	0.0037	-0.0551		PPV	-0.0111	-0.0124	0.0099	-0.0024	-0.018	0.0032		PPV	-0.0207	-0.0251	-0.0099	-0.011	-0.0296	-0.009		PPV	-0.0075	-0.0141	0.0034	-0.0051	-0.0083	0.0185		PPV	-0.0141	0.0085	-0.0109	-0.0047	-0.0012	-0.0061		PPV	-0.0075
								NPV	0.0164	0.0056	0.0065	0.0226	0.0046	0.0011		NPV	-0.0081	-0.0007	-0.0014	0.0053	0.0016	0.001		NPV	-0.0166	-0.0048	-0.0042	0.0085	0.0001	0.0009		NPV	-0.0065	-0.0018	-0.0003	0.0046	0.0021	0.0011		NPV	-0.0139	-0.0042	-0.0032	0.0112	0.0014	0.0008		NPV	-0.0065
								Sensitivity	0.0731	0.0276	0.0366	0.1035	0.0223	0.0107		Sensitivity	-0.0366	-0.0018	-0.0124	0.0276	0.0099	0.0053		Sensitivity	-0.0669	-0.0196	-0.0169	0.0419	0.0045	0.0062		Sensitivity	-0.0294	-0.0072	-0.0035	0.025	0.0116	0.0045		Sensitivity	-0.0571	-0.0214	-0.0107	0.0499	0.0072	0.0054		Sensitivity	-0.0294
								Specificity	-0.025	-0.0063	-0.0167	-0.0329	-0.0042	-0.0063		Specificity	0.0105	-0.0011	0.0083	-0.0104	-0.0037	-0.0011		Specificity	0.0167	0.001	0.0031	-0.0198	-0.0042	-0.0026		Specificity	0.0089	0	0.0026	-0.0104	-0.0031	0		Specificity	0.0157	0.0057	0	-0.0192	-0.0016	-0.0021		Specificity	0.0089
								Accuracy	0.0112	0.0062	0.0029	0.0175	0.0056	0		Accuracy	-0.0069	-0.0013	0.0006	0.0037	0.0013	0.0013		Accuracy	-0.0142	-0.0066	-0.0043	0.0029	-0.001	0.0007		Accuracy	-0.0053	-0.0027	0.0003	0.0027	0.0023	0.0017		Accuracy	-0.0112	-0.0042	-0.0039	0.0062	0.0016	0.0007		Accuracy	-0.0053
								|∆∆Gbinding| ≥ 0.592 kcal/mol								|∆∆Gbinding| ≥ 0.592 kcal/mol								|∆∆Gbinding| ≥ 0.592 kcal/mol								|∆∆Gbinding| ≥ 0.592 kcal/mol								|∆∆Gbinding| ≥ 0.592 kcal/mol								|∆∆Gbinding| ≥ 0.592 kcal/mol
								TP	100	33	54	141	32	22		TP	-50	-1	-23	39	13	7		TP	-85	-22	-16	66	7	8		TP	-38	-12	-10	35	14	6		TP	-73	-28	-14	77	8	6		TP	-38
								TN	-30	-10	-19	-38	-1	-2		TN	11	-1	7	-12	-5	-1		TN	22	2	9	-19	-6	-4		TN	12	-4	-1	-13	-5	1		TN	21	7	-2	-16	-3	-4		TN	12
								FP	30	10	19	38	1	2		FP	-11	1	-7	12	5	1		FP	-22	-2	-9	19	6	4		FP	-12	4	1	13	5	-1		FP	-21	-7	2	16	3	4		FP	-12
								FN	-100	-33	-54	-141	-32	-22		FN	50	1	23	-39	-13	-7		FN	85	22	16	-66	-7	-8		FN	38	12	10	-35	-14	-6		FN	73	28	14	-77	-8	-6		FN	38
								PPV	0.0047	-0.0203	-0.0014	0.0005	0.0236	0.0288		PPV	-0.0103	-0.0062	-0.0014	-0.0026	-0.0199	0.0073		PPV	-0.0089	-0.0096	0.0061	-0.0014	-0.0289	-0.0185		PPV	-0.0014	-0.033	-0.0083	-0.0066	-0.0188	0.0261		PPV	-0.0045	0.009	-0.0109	0.006	-0.0115	-0.0221		PPV	-0.0014
								NPV	0.0137	0.0035	0.0062	0.0193	0.0049	0.003		NPV	-0.0072	-0.0004	-0.0027	0.0048	0.0011	0.0008		NPV	-0.0125	-0.0032	-0.0012	0.0098	0	0.0005		NPV	-0.0048	-0.0027	-0.002	0.0039	0.0013	0.0011		NPV	-0.0103	-0.0033	-0.003	0.0127	0.0007	0.0002		NPV	-0.0048
								Sensitivity	0.0597	0.0197	0.0322	0.0842	0.0191	0.0132		Sensitivity	-0.0298	-0.0006	-0.0137	0.0233	0.0078	0.0042		Sensitivity	-0.0507	-0.0132	-0.0095	0.0394	0.0042	0.0047		Sensitivity	-0.0227	-0.0072	-0.006	0.0209	0.0084	0.0036		Sensitivity	-0.0436	-0.0167	-0.0083	0.046	0.0048	0.0035		Sensitivity	-0.0227
								Specificity	-0.022	-0.0074	-0.0139	-0.0278	-0.0007	-0.0014		Specificity	0.0081	-0.0008	0.0051	-0.0088	-0.0037	-0.0007		Specificity	0.0161	0.0015	0.0066	-0.014	-0.0044	-0.003		Specificity	0.0088	-0.003	-0.0007	-0.0095	-0.0037	0.0008		Specificity	0.0154	0.0052	-0.0015	-0.0118	-0.0022	-0.003		Specificity	0.0088
								Accuracy	0.023	0.0075	0.0115	0.0339	0.0102	0.0066		Accuracy	-0.0129	-0.0007	-0.0053	0.0089	0.0026	0.002		Accuracy	-0.0207	-0.0066	-0.0023	0.0155	0.0003	0.0013		Accuracy	-0.0086	-0.0053	-0.0036	0.0072	0.003	0.0023		Accuracy	-0.0171	-0.0069	-0.0053	0.0201	0.0017	0.0006		Accuracy	-0.0086
							x100	PPV	0.89	4.56	-0.77	0.46	-1.36	-6.51			-2.76	-3.7	-2.24	-1.39	-1.38	-1.77			-3.44	-4.38	-3.23	-1.07	-0.57	0.18			-1.86	-4.12	-1.15	-1.34	0.5	0.33			-2.65	-0.83	-2.05	-0.19	0.75	-1.75			-1.86
								NPV	1.34	0.71	0.42	1.76	0.32	0.07			-0.94	-0.21	-0.52	0.23	0.15	0.05			-1.67	-0.53	-0.74	0.62	0.11	0.11			-0.71	-0.29	-0.23	0.21	0.25	0.07			-1.41	-0.42	-0.46	0.94	0.16	0.03			-0.71
								Sensitivity	8.42	4.28	3.7	11.67	2.36	1.03			-5.32	-0.89	-2.95	2.37	1.18	0.44			-9.02	-2.95	-3.55	4.43	0.89	0.89			-4.14	-1.48	-1.18	2.22	1.63	0.44			-7.69	-2.8	-2.07	5.76	1.04	0.45			-4.14
								Specificity	-3.09	-0.59	-2.03	-4.23	-0.72	-0.72			1.06	-0.25	0.43	-1.48	-0.42	-0.22			1.95	0.17	0.04	-2.33	-0.3	-0.26			0.93	-0.08	0.05	-1.4	-0.34	-0.09			1.78	0.68	-0.08	-2.29	-0.17	-0.3			0.93
								Accuracy	-0.53	0.5	-0.75	-0.69	-0.03	-0.33			-0.37	-0.39	-0.33	-0.63	-0.06	-0.06			-0.49	-0.53	-0.76	-0.82	-0.03	0			-0.2	-0.39	-0.23	-0.59	0.1	0.04			-0.33	-0.1	-0.53	-0.5	0.1	-0.13			-0.2
								PPV	0.77	-0.16	-0.4	0.68	0.37	-5.51			-1.11	-1.24	0.99	-0.24	-1.8	0.32			-2.07	-2.51	-0.99	-1.1	-2.96	-0.9			-0.75	-1.41	0.34	-0.51	-0.83	1.85			-1.41	0.85	-1.09	-0.47	-0.12	-0.61			-0.75
								NPV	1.64	0.56	0.65	2.26	0.46	0.11			-0.81	-0.07	-0.14	0.53	0.16	0.1			-1.66	-0.48	-0.42	0.85	0.01	0.09			-0.65	-0.18	-0.03	0.46	0.21	0.11			-1.39	-0.42	-0.32	1.12	0.14	0.08			-0.65
								Sensitivity	7.31	2.76	3.66	10.35	2.23	1.07			-3.66	-0.18	-1.24	2.76	0.99	0.53			-6.69	-1.96	-1.69	4.19	0.45	0.62			-2.94	-0.72	-0.35	2.5	1.16	0.45			-5.71	-2.14	-1.07	4.99	0.72	0.54			-2.94
								Specificity	-2.5	-0.63	-1.67	-3.29	-0.42	-0.63			1.05	-0.11	0.83	-1.04	-0.37	-0.11			1.67	0.1	0.31	-1.98	-0.42	-0.26			0.89	0	0.26	-1.04	-0.31	0			1.57	0.57	0	-1.92	-0.16	-0.21			0.89
								Accuracy	1.12	0.62	0.29	1.75	0.56	0			-0.69	-0.13	0.06	0.37	0.13	0.13			-1.42	-0.66	-0.43	0.29	-0.1	0.07			-0.53	-0.27	0.03	0.27	0.23	0.17			-1.12	-0.42	-0.39	0.62	0.16	0.07			-0.53
								PPV	0.47	-2.03	-0.14	0.05	2.36	2.88			-1.03	-0.62	-0.14	-0.26	-1.99	0.73			-0.89	-0.96	0.61	-0.14	-2.89	-1.85			-0.14	-3.3	-0.83	-0.66	-1.88	2.61			-0.45	0.9	-1.09	0.6	-1.15	-2.21			-0.14
								NPV	1.37	0.35	0.62	1.93	0.49	0.3			-0.72	-0.04	-0.27	0.48	0.11	0.08			-1.25	-0.32	-0.12	0.98	0	0.05			-0.48	-0.27	-0.2	0.39	0.13	0.11			-1.03	-0.33	-0.3	1.27	0.07	0.02			-0.48
								Sensitivity	5.97	1.97	3.22	8.42	1.91	1.32			-2.98	-0.06	-1.37	2.33	0.78	0.42			-5.07	-1.32	-0.95	3.94	0.42	0.47			-2.27	-0.72	-0.6	2.09	0.84	0.36			-4.36	-1.67	-0.83	4.6	0.48	0.35			-2.27
								Specificity	-2.2	-0.74	-1.39	-2.78	-0.07	-0.14			0.81	-0.08	0.51	-0.88	-0.37	-0.07			1.61	0.15	0.66	-1.4	-0.44	-0.3			0.88	-0.3	-0.07	-0.95	-0.37	0.08			1.54	0.52	-0.15	-1.18	-0.22	-0.3			0.88
								Accuracy	2.3	0.75	1.15	3.39	1.02	0.66			-1.29	-0.07	-0.53	0.89	0.26	0.2			-2.07	-0.66	-0.23	1.55	0.03	0.13			-0.86	-0.53	-0.36	0.72	0.3	0.23			-1.71	-0.69	-0.53	2.01	0.17	0.06			-0.86
[truncated: 68 more columns]
